# Supplementary material for: Time trend analysis of leisure-time activity participation among young-old adults in China 2002–2018
Source: Springer Nature journal article supplement (doi:10.1186/s12889-022-12838-1), 2022-03-02
Supplement: MOESM1 [file 20185514]

# Time trend analysis of leisure-time activity participation among young-old adults in China 2002–2018

## Supplementary material (online)

### Appendix A

Appendix Figure A1: Flow chart of the CLHLS study sample (2002-2018)

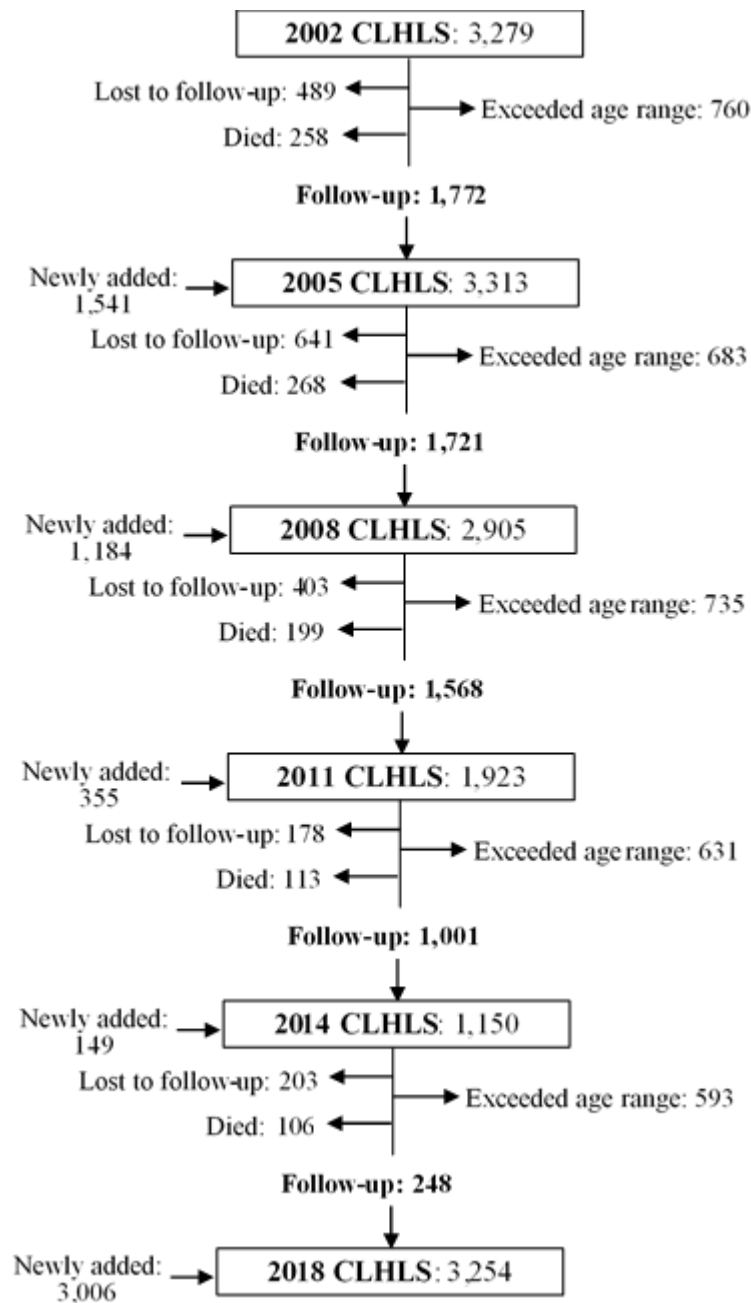

**Appendix Table A1: Full GEE regressions for solitary leisure activities**

|                                             | All<br>OR (95%CI)    | Male, urban<br>OR (95%CI) | Male, rural<br>OR (95%CI) | Female, urban<br>OR (95%CI) | Female, rural<br>OR (95%CI) |
|---------------------------------------------|----------------------|---------------------------|---------------------------|-----------------------------|-----------------------------|
| <b>Dependent variable: Watching TV</b>      |                      |                           |                           |                             |                             |
| Survey waves ( <i>ref: 2002</i> )           |                      |                           |                           |                             |                             |
| 2005                                        | 1.20 (1.03, 1.38)**  | 0.93 (0.59, 1.46)         | 1.29 (0.95, 1.74)*        | 1.21 (0.87, 1.69)           | 1.24 (0.99, 1.55)*          |
| 2008                                        | 1.36 (1.15, 1.62)*** | 1.25 (0.72, 2.16)         | 1.32 (0.96, 1.81)*        | 1.35 (0.90, 2.03)           | 1.45 (1.12, 1.88)***        |
| 2011                                        | 1.28 (1.04, 1.57)**  | 1.41 (0.79, 2.53)         | 1.44 (0.98, 2.11)*        | 1.15 (0.72, 1.83)           | 1.19 (0.86, 1.66)           |
| 2014                                        | 1.30 (1.01, 1.68)**  | 1.34 (0.67, 2.69)         | 1.12 (0.72, 1.74)         | 0.95 (0.54, 1.69)           | 1.70 (1.09, 2.65)**         |
| 2018                                        | 0.83 (0.68, 1.02)*   | 0.54 (0.32, 0.91)**       | 1.08 (0.71, 1.64)         | 0.62 (0.41, 0.94)**         | 1.03 (0.73, 1.44)           |
| <i>Other controls:</i>                      |                      |                           |                           |                             |                             |
| Age                                         | 0.96 (0.94, 0.98)*** | 0.98 (0.92, 1.04)         | 0.92 (0.89, 0.96)***      | 0.98 (0.93, 1.03)           | 0.97 (0.94, 1.00)**         |
| Female                                      | 0.80 (0.71, 0.91)*** | --                        | --                        | --                          | --                          |
| Rural residence                             | 0.65 (0.58, 0.74)*** | --                        | --                        | --                          | --                          |
| Years of schooling                          | 1.14 (1.11, 1.16)*** | 1.13 (1.09, 1.18)***      | 1.10 (1.06, 1.15)***      | 1.19 (1.14, 1.25)***        | 1.14 (1.08, 1.19)***        |
| Married                                     | 1.41 (1.24, 1.60)*** | 1.30 (0.87, 1.95)         | 1.56 (1.21, 2.01)***      | 1.35 (1.03, 1.76)**         | 1.41 (1.16, 1.73)***        |
| Number of living children                   | 1.02 (0.99, 1.06)    | 0.90 (0.81, 1.00)**       | 1.05 (0.98, 1.13)         | 1.01 (0.93, 1.10)           | 1.06 (1.00, 1.13)*          |
| Co-residence with children                  | 0.91 (0.80, 1.03)    | 1.14 (0.79, 1.62)         | 0.95 (0.74, 1.23)         | 0.94 (0.72, 1.23)           | 0.81 (0.66, 1.00)**         |
| Log of income per capita                    | 1.18 (1.14, 1.22)*** | 1.04 (0.92, 1.16)         | 1.18 (1.11, 1.25)***      | 1.31 (1.21, 1.42)***        | 1.16 (1.10, 1.22)***        |
| 1+ ADLs                                     | 0.39 (0.32, 0.49)*** | 0.35 (0.21, 0.56)***      | 0.33 (0.22, 0.50)***      | 0.35 (0.23, 0.53)***        | 0.59 (0.39, 0.88)***        |
| 1+ IADLs                                    | 0.66 (0.58, 0.74)*** | 0.51 (0.36, 0.74)***      | 0.76 (0.58, 1.00)**       | 0.65 (0.50, 0.85)***        | 0.64 (0.54, 0.77)***        |
| Poor self-rated health                      | 0.73 (0.63, 0.84)*** | 0.62 (0.42, 0.91)**       | 0.64 (0.48, 0.85)***      | 0.69 (0.50, 0.96)**         | 0.82 (0.66, 1.03)*          |
| <b>Dependent variable: Doing house work</b> |                      |                           |                           |                             |                             |
| Survey waves ( <i>ref: 2002</i> )           |                      |                           |                           |                             |                             |
| 2005                                        | 1.15 (1.00, 1.32)*   | 1.29 (1.02, 1.64)**       | 1.25 (1.01, 1.55)**       | 0.75 (0.47, 1.18)           | 0.93 (0.58, 1.50)           |
| 2008                                        | 1.04 (0.90, 1.21)    | 1.32 (1.02, 1.71)**       | 1.06 (0.85, 1.33)         | 0.79 (0.48, 1.30)           | 0.80 (0.49, 1.30)           |
| 2011                                        | 1.02 (0.85, 1.21)    | 1.28 (0.95, 1.73)*        | 0.91 (0.70, 1.19)         | 1.04 (0.57, 1.89)           | 0.82 (0.47, 1.45)           |
| 2014                                        | 1.03 (0.83, 1.27)    | 1.45 (1.01, 2.10)**       | 0.99 (0.72, 1.35)         | 0.79 (0.41, 1.53)           | 0.90 (0.44, 1.82)           |

|                                                          | All<br>OR (95%CI)    | Male, urban<br>OR (95%CI) | Male, rural<br>OR (95%CI) | Female, urban<br>OR (95%CI) | Female, rural<br>OR (95%CI) |
|----------------------------------------------------------|----------------------|---------------------------|---------------------------|-----------------------------|-----------------------------|
| 2018                                                     | 0.91 (0.75, 1.09)    | 1.09 (0.80, 1.48)         | 0.90 (0.67, 1.21)         | 0.56 (0.32, 0.98)**         | 1.06 (0.58, 1.94)           |
| <i>Other controls:</i>                                   |                      |                           |                           |                             |                             |
| Age                                                      | 0.96 (0.95, 0.98)*** | 0.98 (0.95, 1.01)         | 0.96 (0.94, 0.99)***      | 0.97 (0.92, 1.02)           | 0.91 (0.86, 0.97)***        |
| Female                                                   | 6.49 (5.73, 7.36)*** | --                        | --                        | --                          | --                          |
| Rural residence                                          | 1.06 (0.95, 1.18)    | --                        | --                        | --                          | --                          |
| Years of schooling                                       | 1.01 (0.99, 1.02)    | 1.02 (1.00, 1.04)*        | 1.00 (0.98, 1.03)         | 1.02 (0.98, 1.06)           | 0.92 (0.87, 0.98)**         |
| Married                                                  | 0.96 (0.85, 1.09)    | 0.95 (0.75, 1.21)         | 0.58 (0.47, 0.72)***      | 1.66 (1.22, 2.27)***        | 1.55 (1.11, 2.15)***        |
| Number of living children                                | 0.99 (0.96, 1.03)    | 0.95 (0.89, 1.01)         | 1.01 (0.96, 1.07)         | 1.01 (0.90, 1.12)           | 1.09 (0.99, 1.21)*          |
| Co-residence with children                               | 0.94 (0.84, 1.05)    | 0.94 (0.79, 1.13)         | 0.98 (0.83, 1.16)         | 1.07 (0.77, 1.50)           | 0.84 (0.58, 1.23)           |
| Log of income per capita                                 | 1.01 (0.97, 1.05)    | 1.00 (0.93, 1.07)         | 1.06 (1.00, 1.12)*        | 0.91 (0.77, 1.07)           | 0.93 (0.80, 1.07)           |
| 1+ ADLs                                                  | 0.16 (0.13, 0.19)*** | 0.17 (0.12, 0.25)***      | 0.30 (0.21, 0.43)***      | 0.10 (0.07, 0.14)***        | 0.12 (0.08, 0.18)***        |
| 1+ IADLs                                                 | 0.38 (0.34, 0.43)*** | 0.38 (0.31, 0.47)***      | 0.40 (0.34, 0.48)***      | 0.30 (0.22, 0.41)***        | 0.34 (0.25, 0.48)***        |
| Poor self-rated health                                   | 0.77 (0.67, 0.88)*** | 0.88 (0.69, 1.12)         | 0.83 (0.67, 1.01)*        | 0.68 (0.48, 0.96)**         | 0.55 (0.39, 0.77)***        |
| <b>Dependent variable: Keeping domestic animals/pets</b> |                      |                           |                           |                             |                             |
| <i>Survey waves (ref: 2002)</i>                          |                      |                           |                           |                             |                             |
| 2005                                                     | 1.11 (1.01, 1.22)**  | 1.41 (1.12, 1.77)***      | 1.08 (0.91, 1.29)         | 1.13 (0.90, 1.42)           | 1.02 (0.85, 1.22)           |
| 2008                                                     | 1.01 (0.91, 1.12)    | 1.55 (1.19, 2.02)***      | 0.93 (0.77, 1.12)         | 1.15 (0.88, 1.50)           | 0.82 (0.68, 1.01)*          |
| 2011                                                     | 1.19 (1.04, 1.35)*** | 2.44 (1.82, 3.27)***      | 0.92 (0.73, 1.14)         | 1.87 (1.38, 2.53)***        | 0.69 (0.54, 0.89)***        |
| 2014                                                     | 1.53 (1.31, 1.78)*** | 3.28 (2.31, 4.66)***      | 1.19 (0.92, 1.55)         | 2.48 (1.71, 3.59)***        | 0.95 (0.71, 1.29)           |
| 2018                                                     | 1.72 (1.50, 1.97)*** | 4.28 (3.14, 5.82)***      | 1.06 (0.82, 1.36)         | 3.54 (2.58, 4.85)***        | 0.81 (0.62, 1.05)           |
| <i>Other controls:</i>                                   |                      |                           |                           |                             |                             |
| Age                                                      | 0.96 (0.95, 0.97)*** | 0.95 (0.93, 0.98)***      | 0.98 (0.96, 1.00)*        | 0.97 (0.94, 1.00)*          | 0.95 (0.93, 0.98)***        |
| Female                                                   | 0.93 (0.86, 1.01)    | --                        | --                        | --                          | --                          |
| Rural residence                                          | 2.62 (2.42, 2.83)*** | --                        | --                        | --                          | --                          |
| Years of schooling                                       | 0.91 (0.90, 0.92)*** | 0.89 (0.87, 0.92)***      | 0.97 (0.95, 0.98)***      | 0.88 (0.85, 0.90)***        | 0.94 (0.91, 0.96)***        |
| Married                                                  | 1.38 (1.27, 1.51)*** | 1.41 (1.09, 1.81)***      | 1.50 (1.26, 1.77)***      | 1.32 (1.09, 1.59)***        | 1.47 (1.27, 1.71)***        |
| Number of living children                                | 1.10 (1.07, 1.13)*** | 1.20 (1.13, 1.28)***      | 1.05 (1.01, 1.10)**       | 1.13 (1.06, 1.20)***        | 1.04 (0.99, 1.09)*          |

|                                                     | All<br>OR (95%CI)    | Male, urban<br>OR (95%CI) | Male, rural<br>OR (95%CI) | Female, urban<br>OR (95%CI) | Female, rural<br>OR (95%CI) |
|-----------------------------------------------------|----------------------|---------------------------|---------------------------|-----------------------------|-----------------------------|
| Co-residence with children                          | 1.50 (1.38, 1.62)*** | 1.55 (1.29, 1.86)***      | 1.61 (1.39, 1.86)***      | 1.64 (1.36, 1.97)***        | 1.44 (1.23, 1.68)***        |
| Log of income per capita                            | 0.88 (0.85, 0.90)*** | 0.73 (0.67, 0.78)***      | 0.95 (0.91, 1.00)*        | 0.73 (0.67, 0.79)***        | 0.95 (0.91, 1.00)*          |
| 1+ ADLs                                             | 0.47 (0.39, 0.58)*** | 0.60 (0.36, 1.00)**       | 0.49 (0.35, 0.70)***      | 0.50 (0.32, 0.78)***        | 0.38 (0.26, 0.55)***        |
| 1+ IADLs                                            | 0.72 (0.66, 0.78)*** | 0.54 (0.42, 0.70)***      | 0.70 (0.59, 0.83)***      | 0.74 (0.61, 0.89)***        | 0.75 (0.65, 0.87)***        |
| Poor self-rated health                              | 0.79 (0.72, 0.88)*** | 0.90 (0.68, 1.20)         | 0.64 (0.53, 0.77)***      | 0.95 (0.75, 1.20)           | 0.82 (0.69, 0.97)**         |
| <b>Dependent variable: Reading newspapers/books</b> |                      |                           |                           |                             |                             |
| Survey waves ( <i>ref: 2002</i> )                   |                      |                           |                           |                             |                             |
| 2005                                                | 0.95 (0.85, 1.06)    | 0.97 (0.78, 1.22)         | 0.77 (0.64, 0.93)***      | 1.18 (0.94, 1.49)           | 1.20 (0.84, 1.70)           |
| 2008                                                | 0.55 (0.48, 0.63)*** | 0.44 (0.34, 0.57)***      | 0.55 (0.45, 0.69)***      | 0.55 (0.41, 0.73)***        | 0.98 (0.65, 1.47)           |
| 2011                                                | 0.51 (0.44, 0.60)*** | 0.42 (0.32, 0.56)***      | 0.58 (0.45, 0.75)***      | 0.49 (0.35, 0.69)***        | 0.63 (0.38, 1.05)*          |
| 2014                                                | 0.43 (0.35, 0.52)*** | 0.36 (0.25, 0.51)***      | 0.48 (0.36, 0.65)***      | 0.37 (0.24, 0.58)***        | 0.88 (0.49, 1.58)           |
| 2018                                                | 0.22 (0.18, 0.26)*** | 0.16 (0.12, 0.21)***      | 0.32 (0.24, 0.43)***      | 0.21 (0.14, 0.30)***        | 0.24 (0.14, 0.42)***        |
| <i>Other controls:</i>                              |                      |                           |                           |                             |                             |
| Age                                                 | 1.00 (0.99, 1.02)    | 1.01 (0.98, 1.04)         | 0.99 (0.97, 1.02)         | 1.01 (0.98, 1.05)           | 1.01 (0.96, 1.06)           |
| Female                                              | 0.46 (0.42, 0.51)*** | --                        | --                        | --                          | --                          |
| Rural residence                                     | 0.52 (0.48, 0.57)*** | --                        | --                        | --                          | --                          |
| Years of schooling                                  | 1.34 (1.32, 1.36)*** | 1.29 (1.25, 1.32)***      | 1.28 (1.25, 1.31)***      | 1.41 (1.37, 1.46)***        | 1.43 (1.36, 1.50)***        |
| Married                                             | 1.19 (1.07, 1.33)*** | 1.39 (1.10, 1.75)***      | 1.34 (1.10, 1.64)***      | 1.03 (0.83, 1.26)           | 1.14 (0.85, 1.52)           |
| Number of living children                           | 0.93 (0.90, 0.96)*** | 0.91 (0.85, 0.96)***      | 1.02 (0.97, 1.07)         | 0.86 (0.80, 0.93)***        | 0.91 (0.84, 0.99)**         |
| Co-residence with children                          | 0.87 (0.79, 0.96)*** | 0.87 (0.73, 1.04)         | 0.93 (0.79, 1.10)         | 0.79 (0.64, 0.98)**         | 0.82 (0.60, 1.12)           |
| Log of income per capita                            | 1.27 (1.21, 1.33)*** | 1.29 (1.19, 1.40)***      | 1.23 (1.15, 1.32)***      | 1.28 (1.15, 1.42)***        | 1.31 (1.12, 1.53)***        |
| 1+ ADLs                                             | 0.57 (0.44, 0.74)*** | 0.42 (0.27, 0.65)***      | 0.73 (0.48, 1.11)         | 0.88 (0.56, 1.37)           | 0.37 (0.11, 1.23)           |
| 1+ IADLs                                            | 0.71 (0.63, 0.79)*** | 0.71 (0.57, 0.89)***      | 0.61 (0.50, 0.76)***      | 0.72 (0.59, 0.88)***        | 0.86 (0.64, 1.15)           |
| Poor self-rated health                              | 0.71 (0.62, 0.81)*** | 0.73 (0.57, 0.94)**       | 0.70 (0.56, 0.87)***      | 0.74 (0.56, 0.97)**         | 0.57 (0.38, 0.85)***        |
| <b>Dependent variable: Gardening</b>                |                      |                           |                           |                             |                             |
| Survey waves ( <i>ref: 2002</i> )                   |                      |                           |                           |                             |                             |
| 2005                                                | 1.08 (0.97, 1.19)    | 1.05 (0.86, 1.27)         | 1.26 (1.00, 1.58)*        | 0.95 (0.77, 1.18)           | 1.11 (0.87, 1.42)           |

|                            | <b>All<br/>OR (95%CI)</b> | <b>Male, urban<br/>OR (95%CI)</b> | <b>Male, rural<br/>OR (95%CI)</b> | <b>Female, urban<br/>OR (95%CI)</b> | <b>Female, rural<br/>OR (95%CI)</b> |
|----------------------------|---------------------------|-----------------------------------|-----------------------------------|-------------------------------------|-------------------------------------|
| 2008                       | 0.74 (0.66, 0.84)***      | 0.58 (0.46, 0.73)***              | 0.89 (0.69, 1.14)                 | 0.62 (0.49, 0.80)***                | 1.04 (0.79, 1.37)                   |
| 2011                       | 1.08 (0.94, 1.23)         | 0.77 (0.60, 1.00)*                | 1.39 (1.05, 1.84)**               | 0.72 (0.55, 0.94)**                 | 1.88 (1.38, 2.55)***                |
| 2014                       | 1.06 (0.90, 1.25)         | 0.67 (0.48, 0.93)**               | 1.35 (0.98, 1.85)*                | 0.82 (0.59, 1.14)                   | 1.91 (1.32, 2.78)***                |
| 2018                       | 0.66 (0.57, 0.77)***      | 0.50 (0.38, 0.65)***              | 0.86 (0.62, 1.19)                 | 0.55 (0.42, 0.73)***                | 1.02 (0.73, 1.43)                   |
| <i>Other controls:</i>     |                           |                                   |                                   |                                     |                                     |
| Age                        | 1.02 (1.01, 1.03)***      | 1.02 (1.00, 1.05)                 | 1.03 (1.00, 1.06)**               | 1.04 (1.01, 1.07)***                | 0.98 (0.95, 1.01)                   |
| Female                     | 1.36 (1.24, 1.48)***      | --                                | --                                | --                                  | --                                  |
| Rural residence            | 0.62 (0.57, 0.68)***      | --                                | --                                | --                                  | --                                  |
| Years of schooling         | 1.10 (1.09, 1.12)***      | 1.09 (1.07, 1.11)***              | 1.09 (1.07, 1.12)***              | 1.12 (1.09, 1.14)***                | 1.12 (1.08, 1.15)***                |
| Married                    | 1.27 (1.15, 1.40)***      | 1.60 (1.26, 2.03)***              | 1.24 (1.00, 1.54)**               | 1.11 (0.94, 1.31)                   | 1.33 (1.10, 1.61)***                |
| Number of living children  | 0.96 (0.93, 0.98)***      | 0.95 (0.90, 1.01)*                | 0.95 (0.90, 1.01)*                | 0.97 (0.92, 1.03)                   | 0.97 (0.92, 1.02)                   |
| Co-residence with children | 0.90 (0.82, 0.98)**       | 0.97 (0.82, 1.13)                 | 0.79 (0.66, 0.95)**               | 0.90 (0.76, 1.07)                   | 0.89 (0.73, 1.08)                   |
| Log of income per capita   | 1.14 (1.10, 1.18)***      | 1.15 (1.08, 1.24)***              | 1.14 (1.06, 1.24)***              | 1.20 (1.12, 1.30)***                | 1.07 (0.99, 1.15)*                  |
| 1+ ADLs                    | 0.55 (0.43, 0.69)***      | 0.51 (0.32, 0.80)***              | 0.67 (0.41, 1.10)                 | 0.53 (0.36, 0.77)***                | 0.75 (0.45, 1.23)                   |
| 1+ IADLs                   | 0.81 (0.73, 0.89)***      | 0.67 (0.54, 0.83)***              | 0.80 (0.64, 1.00)**               | 0.82 (0.69, 0.97)**                 | 0.95 (0.79, 1.14)                   |
| Poor self-rated health     | 0.75 (0.67, 0.85)***      | 0.66 (0.51, 0.84)***              | 0.68 (0.52, 0.88)***              | 0.93 (0.74, 1.16)                   | 0.76 (0.60, 0.97)**                 |

**Appendix Table A2: Full GEE regressions for social leisure activities**

|                                               | All<br>OR (95%CI)    | Male, urban<br>OR (95%CI) | Male, rural<br>OR (95%CI) | Female, urban<br>OR (95%CI) | Female, rural<br>OR (95%CI) |
|-----------------------------------------------|----------------------|---------------------------|---------------------------|-----------------------------|-----------------------------|
| <b>Dependent variable: Outdoor activities</b> |                      |                           |                           |                             |                             |
| <i>Survey waves (ref: 2002)</i>               |                      |                           |                           |                             |                             |
| 2005                                          | 0.71 (0.63, 0.81)*** | 0.85 (0.62, 1.16)         | 0.66 (0.52, 0.83)***      | 0.81 (0.60, 1.09)           | 0.65 (0.52, 0.81)***        |
| 2008                                          | 0.58 (0.51, 0.67)*** | 0.76 (0.54, 1.07)         | 0.50 (0.39, 0.63)***      | 0.76 (0.54, 1.05)*          | 0.54 (0.42, 0.69)***        |
| 2011                                          | 0.47 (0.40, 0.54)*** | 0.55 (0.38, 0.79)***      | 0.39 (0.30, 0.51)***      | 0.56 (0.39, 0.79)***        | 0.47 (0.35, 0.62)***        |
| 2014                                          | 0.41 (0.34, 0.49)*** | 0.40 (0.27, 0.60)***      | 0.33 (0.24, 0.45)***      | 0.51 (0.33, 0.78)***        | 0.49 (0.35, 0.70)***        |
| 2018                                          | 0.74 (0.63, 0.88)*** | 0.67 (0.47, 0.96)**       | 0.76 (0.55, 1.04)*        | 0.56 (0.39, 0.80)***        | 1.15 (0.83, 1.61)           |
| <i>Other controls:</i>                        |                      |                           |                           |                             |                             |
| Age                                           | 1.02 (1.00, 1.04)**  | 1.02 (0.99, 1.06)         | 1.03 (1.00, 1.05)*        | 0.99 (0.95, 1.03)           | 1.02 (0.99, 1.05)           |
| Female                                        | 1.15 (1.05, 1.26)*** | --                        | --                        | --                          | --                          |
| Rural residence                               | 0.71 (0.65, 0.78)*** | --                        | --                        | --                          | --                          |
| Years of schooling                            | 1.06 (1.04, 1.07)*** | 1.06 (1.03, 1.08)***      | 1.05 (1.03, 1.08)***      | 1.06 (1.03, 1.09)***        | 1.04 (1.01, 1.08)**         |
| Married                                       | 0.98 (0.88, 1.08)    | 1.04 (0.79, 1.37)         | 0.88 (0.73, 1.08)         | 0.97 (0.79, 1.20)           | 0.96 (0.82, 1.14)           |
| Number of living children                     | 0.99 (0.96, 1.02)    | 1.01 (0.94, 1.08)         | 1.05 (1.00, 1.11)**       | 0.95 (0.89, 1.02)           | 0.96 (0.92, 1.01)           |
| Co-residence with children                    | 0.89 (0.81, 0.97)**  | 0.88 (0.72, 1.09)         | 0.88 (0.75, 1.04)         | 0.95 (0.77, 1.17)           | 0.82 (0.69, 0.99)**         |
| Log of income per capita                      | 1.06 (1.03, 1.10)*** | 1.08 (1.01, 1.17)**       | 1.06 (1.00, 1.11)**       | 1.13 (1.06, 1.21)***        | 1.03 (0.97, 1.09)           |
| 1+ ADLs                                       | 0.32 (0.27, 0.38)*** | 0.20 (0.14, 0.28)***      | 0.44 (0.31, 0.62)***      | 0.33 (0.23, 0.46)***        | 0.39 (0.27, 0.57)***        |
| 1+ IADLs                                      | 0.70 (0.64, 0.78)*** | 0.67 (0.52, 0.86)***      | 0.73 (0.60, 0.89)***      | 0.61 (0.49, 0.75)***        | 0.78 (0.66, 0.93)***        |
| Poor self-rated health                        | 0.75 (0.67, 0.84)*** | 0.73 (0.55, 0.96)**       | 0.72 (0.58, 0.88)***      | 0.67 (0.52, 0.85)***        | 0.84 (0.69, 1.03)*          |
| <b>Dependent variable: Regular exercise</b>   |                      |                           |                           |                             |                             |
| <i>Survey waves (ref: 2002)</i>               |                      |                           |                           |                             |                             |
| 2005                                          | 0.97 (0.88, 1.06)    | 0.91 (0.74, 1.11)         | 0.94 (0.77, 1.13)         | 1.14 (0.93, 1.38)           | 0.92 (0.75, 1.13)           |
| 2008                                          | 0.81 (0.73, 0.91)*** | 0.77 (0.62, 0.97)**       | 0.82 (0.67, 1.02)*        | 0.85 (0.67, 1.06)           | 0.76 (0.60, 0.96)**         |
| 2011                                          | 0.80 (0.70, 0.91)*** | 0.60 (0.47, 0.78)***      | 0.70 (0.55, 0.89)***      | 0.84 (0.65, 1.09)           | 1.28 (0.97, 1.69)*          |
| 2014                                          | 0.51 (0.44, 0.60)*** | 0.31 (0.23, 0.43)***      | 0.58 (0.43, 0.77)***      | 0.64 (0.46, 0.88)***        | 0.61 (0.42, 0.87)***        |

|                                                    | All<br>OR (95%CI)    | Male, urban<br>OR (95%CI) | Male, rural<br>OR (95%CI) | Female, urban<br>OR (95%CI) | Female, rural<br>OR (95%CI) |
|----------------------------------------------------|----------------------|---------------------------|---------------------------|-----------------------------|-----------------------------|
| 2018                                               | 0.55 (0.48, 0.63)*** | 0.35 (0.27, 0.46)***      | 0.84 (0.64, 1.10)         | 0.48 (0.37, 0.63)***        | 0.78 (0.58, 1.05)           |
| <i>Other controls:</i>                             |                      |                           |                           |                             |                             |
| Age                                                | 1.04 (1.03, 1.06)*** | 1.05 (1.02, 1.08)***      | 1.05 (1.02, 1.07)***      | 1.03 (1.00, 1.06)**         | 1.04 (1.01, 1.07)***        |
| Female                                             | 1.12 (1.03, 1.21)*** | --                        | --                        | --                          | --                          |
| Rural residence                                    | 0.44 (0.41, 0.47)*** | --                        | --                        | --                          | --                          |
| Years of schooling                                 | 1.10 (1.09, 1.11)*** | 1.10 (1.08, 1.12)***      | 1.10 (1.08, 1.12)***      | 1.08 (1.06, 1.11)***        | 1.11 (1.07, 1.14)***        |
| Married                                            | 0.91 (0.84, 1.00)**  | 1.04 (0.85, 1.28)         | 0.82 (0.68, 0.98)**       | 0.95 (0.81, 1.11)           | 0.83 (0.70, 0.98)**         |
| Number of living children                          | 0.94 (0.92, 0.97)*** | 0.94 (0.89, 0.99)**       | 0.99 (0.95, 1.04)         | 0.90 (0.85, 0.95)***        | 0.94 (0.90, 0.99)**         |
| Co-residence with children                         | 0.95 (0.88, 1.03)    | 1.04 (0.89, 1.21)         | 0.88 (0.75, 1.02)*        | 0.95 (0.81, 1.11)           | 0.92 (0.77, 1.10)           |
| Log of income per capita                           | 1.12 (1.08, 1.15)*** | 1.16 (1.09, 1.24)***      | 1.09 (1.02, 1.15)***      | 1.16 (1.08, 1.24)***        | 1.07 (1.00, 1.13)**         |
| 1+ ADLs                                            | 0.51 (0.42, 0.63)*** | 0.42 (0.29, 0.62)***      | 0.55 (0.36, 0.82)***      | 0.52 (0.36, 0.73)***        | 0.71 (0.46, 1.10)           |
| 1+ IADLs                                           | 0.81 (0.74, 0.89)*** | 0.76 (0.63, 0.93)***      | 1.09 (0.91, 1.31)         | 0.70 (0.60, 0.82)***        | 0.81 (0.68, 0.96)**         |
| Poor self-rated health                             | 0.77 (0.69, 0.86)*** | 0.75 (0.59, 0.94)**       | 0.73 (0.59, 0.90)***      | 0.69 (0.56, 0.86)***        | 0.91 (0.74, 1.12)           |
| <b>Dependent variable: Playing cards/mah-jongg</b> |                      |                           |                           |                             |                             |
| <i>Survey waves (ref: 2002)</i>                    |                      |                           |                           |                             |                             |
| 2005                                               | 0.96 (0.88, 1.06)    | 0.91 (0.76, 1.09)         | 0.96 (0.81, 1.14)         | 0.96 (0.78, 1.18)           | 1.00 (0.81, 1.24)           |
| 2008                                               | 0.89 (0.80, 0.99)**  | 0.85 (0.69, 1.05)         | 0.78 (0.64, 0.95)**       | 0.89 (0.70, 1.13)           | 0.98 (0.77, 1.24)           |
| 2011                                               | 0.81 (0.71, 0.92)*** | 0.70 (0.54, 0.90)***      | 0.67 (0.53, 0.85)***      | 0.97 (0.74, 1.28)           | 0.85 (0.62, 1.18)           |
| 2014                                               | 0.87 (0.74, 1.02)*   | 0.64 (0.46, 0.87)***      | 0.92 (0.70, 1.21)         | 0.77 (0.54, 1.10)           | 1.02 (0.70, 1.47)           |
| 2018                                               | 0.77 (0.67, 0.88)*** | 0.78 (0.61, 1.00)**       | 0.80 (0.61, 1.04)*        | 0.73 (0.54, 0.98)**         | 0.70 (0.51, 0.96)**         |
| <i>Other controls:</i>                             |                      |                           |                           |                             |                             |
| Age                                                | 1.00 (0.98, 1.01)    | 1.00 (0.97, 1.02)         | 1.01 (0.99, 1.04)         | 1.00 (0.97, 1.02)           | 0.98 (0.95, 1.01)           |
| Female                                             | 0.69 (0.63, 0.76)*** | --                        | --                        | --                          | --                          |
| Rural residence                                    | 0.90 (0.83, 0.97)*** | --                        | --                        | --                          | --                          |
| Years of schooling                                 | 1.04 (1.03, 1.05)*** | 1.02 (1.00, 1.03)*        | 1.04 (1.02, 1.07)***      | 1.07 (1.05, 1.09)***        | 1.11 (1.07, 1.15)***        |
| Married                                            | 0.99 (0.90, 1.09)    | 0.83 (0.67, 1.02)*        | 1.15 (0.95, 1.39)         | 0.87 (0.72, 1.04)           | 1.01 (0.83, 1.23)           |
| Number of living children                          | 0.96 (0.94, 0.99)*** | 0.99 (0.94, 1.05)         | 0.98 (0.93, 1.03)         | 0.98 (0.92, 1.04)           | 0.92 (0.87, 0.98)***        |

|                                                        | All<br>OR (95%CI)    | Male, urban<br>OR (95%CI) | Male, rural<br>OR (95%CI) | Female, urban<br>OR (95%CI) | Female, rural<br>OR (95%CI) |
|--------------------------------------------------------|----------------------|---------------------------|---------------------------|-----------------------------|-----------------------------|
| Co-residence with children                             | 0.86 (0.79, 0.93)*** | 0.90 (0.77, 1.05)         | 0.80 (0.69, 0.94)***      | 0.87 (0.73, 1.04)           | 0.81 (0.66, 0.98)**         |
| Log of income per capita                               | 1.07 (1.04, 1.11)*** | 1.02 (0.96, 1.08)         | 1.14 (1.07, 1.20)***      | 1.05 (0.97, 1.13)           | 1.08 (1.01, 1.16)**         |
| 1+ ADLs                                                | 0.43 (0.34, 0.55)*** | 0.37 (0.23, 0.61)***      | 0.34 (0.21, 0.56)***      | 0.48 (0.31, 0.75)***        | 0.64 (0.38, 1.07)*          |
| 1+ IADLs                                               | 0.76 (0.70, 0.83)*** | 0.72 (0.60, 0.88)***      | 0.71 (0.59, 0.86)***      | 0.84 (0.70, 1.01)*          | 0.75 (0.62, 0.90)***        |
| Poor self-rated health                                 | 0.81 (0.73, 0.90)*** | 0.94 (0.74, 1.18)         | 0.84 (0.68, 1.02)*        | 0.82 (0.65, 1.03)*          | 0.62 (0.48, 0.80)***        |
| <b>Dependent variable: Tourism</b>                     |                      |                           |                           |                             |                             |
| Survey waves ( <i>ref: 2002</i> )                      |                      |                           |                           |                             |                             |
| 2005                                                   | 0.82 (0.71, 0.94)*** | 0.73 (0.57, 0.94)**       | 0.79 (0.57, 1.09)         | 0.84 (0.63, 1.12)           | 0.93 (0.66, 1.31)           |
| 2008                                                   | 0.52 (0.44, 0.62)*** | 0.38 (0.29, 0.51)***      | 0.45 (0.31, 0.65)***      | 0.66 (0.49, 0.89)***        | 0.66 (0.45, 0.97)**         |
| 2011                                                   | 0.71 (0.59, 0.85)*** | 0.58 (0.43, 0.80)***      | 0.48 (0.32, 0.72)***      | 0.89 (0.64, 1.24)           | 1.08 (0.69, 1.69)           |
| 2014                                                   | 0.57 (0.45, 0.71)*** | 0.26 (0.17, 0.41)***      | 0.62 (0.40, 0.96)**       | 0.75 (0.49, 1.15)           | 0.87 (0.50, 1.52)           |
| 2018                                                   | 0.85 (0.70, 1.02)*   | 0.61 (0.44, 0.84)***      | 0.61 (0.39, 0.95)**       | 1.03 (0.74, 1.45)           | 1.18 (0.72, 1.94)           |
| <i>Other controls:</i>                                 |                      |                           |                           |                             |                             |
| Age                                                    | 0.99 (0.97, 1.00)    | 0.99 (0.96, 1.02)         | 0.99 (0.96, 1.03)         | 0.96 (0.93, 0.99)**         | 1.00 (0.96, 1.05)           |
| Female                                                 | 1.45 (1.30, 1.62)*** | --                        | --                        | --                          | --                          |
| Rural residence                                        | 0.56 (0.51, 0.62)*** | --                        | --                        | --                          | --                          |
| Years of schooling                                     | 1.15 (1.13, 1.16)*** | 1.14 (1.11, 1.16)***      | 1.13 (1.10, 1.17)***      | 1.15 (1.12, 1.17)***        | 1.13 (1.09, 1.18)***        |
| Married                                                | 1.13 (1.00, 1.28)*   | 1.44 (1.08, 1.93)**       | 1.28 (0.93, 1.76)         | 1.05 (0.86, 1.27)           | 1.00 (0.77, 1.30)           |
| Number of living children                              | 0.98 (0.94, 1.01)    | 0.97 (0.90, 1.04)         | 1.04 (0.96, 1.12)         | 0.95 (0.89, 1.02)           | 0.96 (0.89, 1.04)           |
| Co-residence with children                             | 0.84 (0.75, 0.94)*** | 0.59 (0.49, 0.72)***      | 0.83 (0.64, 1.08)         | 1.05 (0.85, 1.29)           | 1.01 (0.76, 1.33)           |
| Log of income per capita                               | 1.31 (1.23, 1.39)*** | 1.63 (1.45, 1.82)***      | 1.41 (1.25, 1.60)***      | 1.21 (1.08, 1.35)***        | 1.08 (0.96, 1.22)           |
| 1+ ADLs                                                | 0.59 (0.43, 0.81)*** | 0.54 (0.31, 0.95)**       | 0.82 (0.39, 1.76)         | 0.53 (0.31, 0.91)**         | 0.72 (0.34, 1.53)           |
| 1+ IADLs                                               | 0.67 (0.59, 0.77)*** | 0.61 (0.47, 0.81)***      | 0.68 (0.47, 0.96)**       | 0.72 (0.58, 0.89)***        | 0.62 (0.46, 0.82)***        |
| Poor self-rated health                                 | 0.63 (0.54, 0.75)*** | 0.60 (0.43, 0.83)***      | 0.47 (0.29, 0.75)***      | 0.69 (0.52, 0.91)***        | 0.70 (0.49, 1.00)*          |
| <b>Dependent variable: Attending social activities</b> |                      |                           |                           |                             |                             |
| Survey waves ( <i>ref: 2002</i> )                      |                      |                           |                           |                             |                             |
| 2005                                                   | 0.92 (0.83, 1.04)    | 0.98 (0.80, 1.20)         | 0.89 (0.71, 1.12)         | 1.05 (0.83, 1.32)           | 0.80 (0.62, 1.05)           |



|                            | <b>All</b><br>OR (95%CI) | <b>Male, urban</b><br>OR (95%CI) | <b>Male, rural</b><br>OR (95%CI) | <b>Female, urban</b><br>OR (95%CI) | <b>Female, rural</b><br>OR (95%CI) |
|----------------------------|--------------------------|----------------------------------|----------------------------------|------------------------------------|------------------------------------|
| 2008                       | 0.67 (0.59, 0.77)***     | 0.58 (0.46, 0.73)***             | 0.63 (0.49, 0.82)***             | 0.75 (0.57, 0.97)**                | 0.78 (0.58, 1.04)*                 |
| 2011                       | 0.63 (0.54, 0.73)***     | 0.56 (0.42, 0.74)***             | 0.51 (0.37, 0.68)***             | 0.89 (0.67, 1.19)                  | 0.65 (0.44, 0.96)**                |
| 2014                       | 0.54 (0.45, 0.65)***     | 0.46 (0.33, 0.66)***             | 0.42 (0.29, 0.60)***             | 0.84 (0.59, 1.20)                  | 0.61 (0.39, 0.96)**                |
| 2018                       | 0.39 (0.33, 0.46)***     | 0.34 (0.26, 0.45)***             | 0.43 (0.31, 0.61)***             | 0.41 (0.30, 0.57)***               | 0.42 (0.28, 0.64)***               |
| <i>Other controls:</i>     |                          |                                  |                                  |                                    |                                    |
| Age                        | 1.00 (0.99, 1.02)        | 1.01 (0.98, 1.03)                | 1.02 (0.99, 1.05)                | 1.00 (0.98, 1.03)                  | 0.97 (0.93, 1.00)*                 |
| Female                     | 1.08 (0.99, 1.19)*       | --                               | --                               | --                                 | --                                 |
| Rural residence            | 0.61 (0.56, 0.66)***     | --                               | --                               | --                                 | --                                 |
| Years of schooling         | 1.11 (1.09, 1.12)***     | 1.10 (1.08, 1.12)***             | 1.07 (1.05, 1.10)***             | 1.13 (1.10, 1.15)***               | 1.11 (1.07, 1.15)***               |
| Married                    | 1.13 (1.02, 1.25)**      | 1.16 (0.93, 1.45)                | 1.48 (1.17, 1.88)***             | 0.98 (0.83, 1.17)                  | 1.04 (0.84, 1.29)                  |
| Number of living children  | 0.93 (0.90, 0.96)***     | 0.91 (0.86, 0.97)***             | 0.96 (0.91, 1.01)                | 0.89 (0.84, 0.95)***               | 0.95 (0.90, 1.01)                  |
| Co-residence with children | 0.81 (0.74, 0.89)***     | 0.79 (0.67, 0.94)***             | 0.88 (0.73, 1.06)                | 0.76 (0.64, 0.92)***               | 0.79 (0.62, 1.00)**                |
| Log of income per capita   | 1.27 (1.21, 1.33)***     | 1.30 (1.19, 1.42)***             | 1.30 (1.18, 1.42)***             | 1.29 (1.18, 1.41)***               | 1.18 (1.06, 1.32)***               |
| 1+ ADLs                    | 0.58 (0.45, 0.74)***     | 0.45 (0.27, 0.73)***             | 0.80 (0.47, 1.36)                | 0.70 (0.47, 1.06)*                 | 0.53 (0.27, 1.02)*                 |
| 1+ IADLs                   | 0.74 (0.66, 0.82)***     | 0.66 (0.53, 0.84)***             | 0.65 (0.51, 0.83)***             | 0.71 (0.60, 0.86)***               | 0.95 (0.76, 1.19)                  |
| Poor self-rated health     | 0.77 (0.67, 0.88)***     | 0.76 (0.58, 1.00)**              | 0.65 (0.49, 0.85)***             | 0.77 (0.61, 0.98)**                | 0.91 (0.69, 1.20)                  |
